# Supplementary material for: Multiplex Networks to Characterize Seizure Development in Traumatic Brain Injury Patients
Source: Front Neurosci. 2020 Nov 30;14:591662. doi: 10.3389/fnins.2020.591662 (PMC7734183; doi:10.3389/fnins.2020.591662)
Supplement: Supplementary file 7 [file Data_Sheet_7.CSV]

13.5609	28.1357	53.1461	70.1898	38.5217	33.9214	8.4834	31.7841	21.5849	15.871	73.0851	16.7629	27.3129	8.2402	7.4443	17.7368	1	22.4164	1	22.1872	13.1759	22.4136	118.2123	46.2481	22.6746	36.2109	26.2961	6.064	64.5461	112.3054	54.7395	30.6678	95.3265	23.1376	20.7057	27.4842	8.2222	7.15	20.4065	6.261	114.1387	5.5976	50.9542	8.2205	48.2944	103.4985	57.8508	35.6416	63.033	9.3653
27.4034	64.4397	83.1804	47.751	121.5257	41.5443	44.198	127.2102	63.0439	14.6572	92.5893	18.9634	2.9794	97.3327	21.9103	29.0802	19.7694	33.7728	14.1935	52.0067	11.2479	93.8064	142.7064	60.7227	21.5361	58.082	1.985	70.3441	86.8806	127.9466	100.6651	18.8444	123.5411	1.3195	64.9893	44.0056	71.1138	37.9911	30.9188	21.9064	129.6592	51.7138	32.241	58.9521	39.8827	122.3135	23.168	85.6593	117.4764	66.8816
31.7542	46.6245	53.3987	90.8912	4.784	36.2392	75.3418	95.1391	55.6191	7.9684	85.4587	21.4444	29.3019	40.0323	4.8049	34.1764	6.4276	51.4374	3.734	38.2297	16.8189	5.8722	132.1888	57.9777	56.4162	36.4827	2.6268	19.9281	31.2705	129.1247	47.6423	13.8334	109.6095	3.2912	71.0253	25.6692	61.2015	20.6066	37.6211	38.2649	130.6925	13.7344	50.6982	7.6603	70.2789	113.3259	55.9259	89.2479	111.8657	64.3016
14.3326	68.9039	94.3391	79.3312	3.3297	54.8301	78.194	144.4764	106.0582	3.9311	100.7463	39.9346	30.489	82.4597	23.9489	40.7119	10.0906	36.6338	7.9389	50.0505	24.7132	12.3102	149.4669	65.3674	71.5236	31.6624	22.261	16.7923	55.5682	149.6791	57.5667	30.7932	134.6	22.7062	79.3305	27.0628	73.1345	36.8527	69.7852	31.1636	141.4862	36.3594	51.7418	8.1778	54.2069	128.5501	42.5351	99.7895	127.4635	81.7957
20.6568	26.1923	87.2563	37.0778	73.635	42.0415	20.86	95.7483	19.6947	45.6143	56.6984	10.7788	6.6507	7.6073	27.7476	14.9538	17.3615	17.834	1.6116	37.9229	13.3705	41.2615	101.2736	39.6109	32.7535	41.9192	5.0678	11.3344	13.5863	102.0209	2.5884	20.0305	77.7402	17.4813	42.8128	17.2632	16.9725	20.6433	18.4187	20.7095	109.9836	1.3197	54.2335	18.8515	45.5989	102.8889	28.7941	40.8289	60.2707	42.1004
12.1453	36.6949	95.4904	89.1871	21.3342	47.3001	20.5118	144.9622	66.6219	2.0063	105.4022	23.6065	71.7612	71.3673	11.1126	30.6874	1.3286	5.864	1	58.7536	28.0519	7.0158	138.8208	55.2685	109.4156	19.2537	1	33.4641	64.9118	140.8202	45.0373	40.185	125.2739	3.594	44.4632	9.5401	96.8826	19.7648	19.6212	17.5272	140.4188	1	75.3024	15.1071	89.5615	122.8081	46.3943	80.6336	110.1492	38.8634
5.6312	46.221	71.6136	84.834	41.4017	41.9041	59.362	130.0753	68.904	3.7007	86.4013	32.6469	80.3138	24.7186	38.2771	33.8322	1.6695	7.2008	9.4178	20.7508	21.3185	5.3146	136.0315	57.2165	43.3383	40.3674	1.9246	30.9744	46.9474	138.0667	105.3075	51.9277	133.8439	35.2015	68.209	38.5617	100.4786	9.6769	23.9133	20.6146	139.7048	11.976	88.8249	21.4279	80.6981	122.212	57.2359	82.204	110.904	29.4028
25.1572	42.5061	81.1868	80.4341	49.0265	44.1349	17.7559	94.4334	58.5018	2.6166	101.6656	33.1527	78.7336	1	33.1702	23.8297	7.2501	11.8972	6.7444	3.2426	17.6862	97.2658	71.7849	47.9613	36.1591	37.5574	1	20.1603	109.9667	67.6501	72.7846	21.5497	105.9548	10.6502	49.1062	33.3419	67.0971	1.3471	16.9255	6.8069	95.0836	11.999	14.6473	73.1843	35.653	107.3778	58.5583	83.9238	66.1973	85.0107
16.2348	33.4271	95.1862	88.3874	29.4592	51.2168	40.0999	134.5418	53.3524	9.5573	95.7311	20.6325	71.7593	90.6022	21.4596	32.2563	5.9536	26.3563	3.8814	65.3265	7.0942	31.6651	144.5288	76.3961	110.3614	70.7707	18.1566	98.345	29.153	146.3632	110.3596	46.8946	136.7042	7.9605	75.5771	60.0306	104.5796	53.6055	42.9476	23.6983	144.4831	15.8397	37.32	81.1953	71.6275	125.8404	84.0887	86.4768	128.8388	90.2519
22.7999	42.7023	77.7097	50.0956	1.9645	37.3111	39.736	103.5804	30.7206	11.5519	93.6688	15.4414	48.5529	76.686	17.9109	23.1344	1	23.2805	1.9929	1.7426	9.256	4.3528	122.1479	42.9829	95.6785	58.9545	13.082	65.6712	37.447	121.5321	38.1907	34.9321	81.8568	6.155	5.6289	37.7987	92.0075	14.5042	59.0541	28.3492	125.2132	25.2491	53.6328	66.1336	67.3709	97.4907	42.0804	13.7176	37.2194	4.1598
14.6579	18.6779	67.5097	76.8569	64.7163	45.2649	27.9746	109.7976	63.9033	4.7317	70.4726	43.5869	20.7349	22.2266	4.4243	32.1838	6.0461	6.7606	4.6047	35.293	13.1447	7.2118	87.1492	55.3343	2.9858	28.8692	2.335	6.7161	55.1331	50.6592	72.7814	36.6336	92.3397	6.0088	55.7249	17.3065	2.4898	60.1493	30.4518	13.8241	54.5107	9.5055	31.7962	16.2972	56.1175	112.3283	18.5478	64.7591	103.0238	58
29.59	27.1756	86.1976	76.3585	6.5494	33.0309	39.2267	115.982	31.1475	32.8309	63.9224	8.7014	55.947	25.1094	15.1138	23.7931	1.3173	14.5812	4.5653	39.6796	4.9047	21.3509	102.288	61.8488	10.935	47.8327	1.3013	11.6989	109.7024	98.0331	96.8667	27.3978	110.0878	1	38.2078	29.6867	42.4636	44.9535	9.0711	5.0615	69.7672	4.1973	24.6559	67.484	41.1649	106.8562	56.4828	91.0445	103.5777	57.1149
23.3046	34.8278	82.4996	82.5451	123.6975	50.9784	19.7273	101.4384	107.2366	24.339	61.8082	49.0113	42.0309	31.018	24.7656	26.7239	8.6874	8.3635	7.2543	9.7403	20.0897	17.1787	148.2355	71.3723	55.3293	67.4522	8.5446	9.6096	44.5163	142.8219	80.157	102.4486	119.6584	74.9649	62.0647	30.7553	31.4194	69.3975	72.0098	37.0175	143.9026	42.15	110.5815	106.9078	109.7935	139.6718	91.4637	88.6173	99.8034	76.1836
42.35	72.0655	81.0409	92.6695	122.9227	45.6556	60.3224	136.8107	36.3221	11.1853	99.372	18.0981	51.3857	34.9816	35.5961	39.7529	51.1279	28.6336	11.8321	75.6126	37.7701	27.2672	150.9149	66.5263	52.6839	58.594	63.7482	11.879	29.5338	134.2951	57.0764	67.6867	118.6571	67.7033	98.2017	80.1618	68.0534	49.0577	63.4132	15.6892	142.0113	57.6244	57.5096	41.1404	75.0552	124.2022	62.8956	102.295	113.286	75.5288
34.2365	18.7016	74.9559	77.9566	106.1027	51.4931	14.27	108.5393	80.8525	24.9214	46.43	24.0558	8.6707	57.8815	32.3172	9.5786	12.606	8.6258	20.4931	4.74	19.4252	24.8103	128.07	60.9597	48.4565	24.2641	62.212	44.9842	7.2376	123.7502	62.9483	51.1957	110.3561	23.2957	26.1564	44.6984	2.8561	38.9107	68.2615	1	133.0296	22.0917	52.635	12.6119	59.7477	116.8678	73.1211	92.9575	108.1304	71.1744
28.6333	87.286	93.5712	51.8218	82.1869	51.2398	24.8384	113.7453	74.6618	15.1804	108.2115	28.7947	57.1928	59.4404	26.7194	23.4081	7.9577	22.1307	7.7033	74.1239	21.4625	6.91	140.6817	56.6098	50.0801	39.6231	22.2436	67.3639	10.9224	136.825	65.3899	50.9433	121.1135	16.0368	82.7799	43.921	68.7817	53.2173	60.2856	73.8701	128.1441	40.4586	91.1322	26.9877	77.1717	133.9634	18.6554	90.3203	115.0803	76.4521
42.3758	83.5812	91.9133	74.579	96.2088	47.9424	34.8011	120.6067	69.165	14.698	64.9008	48.7239	55.504	29.7463	29.1134	27.1862	13.9548	20.3443	2.2947	28.1899	62.917	28.6864	139.8353	57.585	32.6336	32.059	52.4356	20.4669	28.358	121.043	42.1685	31.2794	115.8985	32.421	73.6693	31.4325	72.1634	42.0894	66.4962	12.7774	135.1875	7.6322	96.3868	41.2987	75.4503	100.1343	30.9384	86.4836	118.2175	53.1832
23.8907	28.2624	89.5179	80.5262	105.037	38.5292	44.527	140.7093	60.7884	2.9863	85.1903	29.6588	58.6474	21.4085	8.7744	32.1568	3.3355	21.0244	1	65.329	24.2261	1	147.8195	61.6142	6.9157	29.8182	6.0137	72.1848	11.8374	141.1267	87.8696	80.8633	132.8599	56.1477	74.7124	48.7036	5.0468	49.5574	47.93	32.2044	143.4973	37.5177	76.4013	22.746	90.5168	120.2563	61.4766	100.5186	121.472	88.9604
23.6004	84.136	42.27	78.7817	86.956	21.9059	21.3994	96.7405	3.4568	21.3839	1	27.3216	3.5552	7.3719	39.9406	16.8131	10.9399	1	36.282	9.1538	40.88	45.4346	117.7846	12.9558	5.2793	38.5076	39.6626	23.4497	13.5329	115.1612	23.785	19.4703	99.455	56.0345	64.0079	59.7202	6.6426	20.7936	34.4734	27.7645	112.0972	47.6352	46.1504	92.5888	38.9963	109.4646	3.2842	73.7189	88.9964	63.0481
33.6725	52.5749	98.9078	92.2258	83.5825	67.7504	70.7096	146.1936	123.3251	14.4682	78.6429	44.7551	65.3601	24.7012	24.2042	33.7225	74.5292	28.3476	22.5022	63.0137	27.8528	5.6997	155.5556	76.7956	66.1783	28.574	2.8469	24.7785	78.6292	154.3247	68.3961	35.443	145.1461	65.1535	97.4048	57.922	92.4208	17.8016	74.6179	35.149	154.2889	98.5951	49.0302	22.1946	85.4081	132.7929	63.3387	116.4184	139.7215	123.605
22.4412	65.3224	81.893	100.8291	86.4617	60.3192	92.7792	148.1936	45.2604	1.9256	64.6582	26.6123	3.5747	88.9758	11.9988	24.1357	13.1483	20.7472	10.6034	93.2695	15.649	18.5303	158.7327	75.3063	87.4581	59.4022	1.6294	8.7436	60.2184	151.064	28.3567	31.341	141.2252	54.427	83.1099	33.6588	107.8451	94.8665	44.8608	42.089	144.3948	68.7669	57.8866	5.5864	99.579	129.3814	57.2395	106.7448	128.6532	100.5132
18.4812	53.3496	80.9841	88.4034	103.0629	55.1247	52.4974	128.2673	35.046	1.9787	77.7469	23.1488	8.3693	31.4348	8.3696	23.994	4.8668	1.3049	1.6218	49.1401	31.7674	17.5612	147.9086	69.6495	83.1981	53.6622	2.5613	11.5784	48.5899	141.8769	48.6312	37.0454	124.3445	35.7107	72.8701	44.447	94.9866	30.5532	42.575	41.5795	135.2572	4.6941	53.019	5.8525	62.2616	124.7176	46.6107	93.1251	123.631	77.2197
31.6358	50.5622	69.3078	96.7441	96.7439	50.7813	98.1856	145.2498	90.2731	3.0003	76.5168	26.6157	87.9266	50.1183	19.0951	36.927	11.3665	43.9097	3.3186	37.5534	22.6517	2.3472	147.1493	83.8101	94.1322	21.0047	27.903	8.9415	44.3449	141.5607	36.9681	28.1292	126.5735	11.4498	67.9516	20.1057	96.8512	40.2903	47.2303	23.9395	139.3664	21.3509	28.7096	7.2238	44.6152	119.7089	43.8221	102.4184	121.2217	105.1354
30.3838	19.131	23.8096	64.7797	67.332	21.7748	15.3565	112.8216	37.427	51.9974	16.3225	3.432	23.0527	24.6458	39.6215	6.2964	41.4803	40.0344	13.2117	108.423	5.7215	25.3355	114.1868	67.538	43.8882	13.2759	18.6635	8.9311	49.689	121.0696	2.6294	44.2002	120.7471	87.2175	66.2819	59.5146	67.6697	39.3824	32.2581	37.8044	119.8861	83.2581	20.4651	91.16	27.5788	117.4723	93.5128	99.892	110.0782	75.6721
18.9443	52.6925	74.5345	76.1127	58.5246	48.9391	63.9569	112.3404	43.4729	3.0877	62.7316	17.4376	7.172	4.6186	6.0964	40.3907	1	14.7254	7.04	21.7869	32.1232	17.3966	124.3127	30.3372	93.718	48.0306	1	25.1892	52.0926	123.3266	43.2709	1	130.356	32.2057	70.5256	19.6126	64.4744	24.2552	20.7471	39.4601	121.0814	12.4878	32.5678	33.0607	29.4206	119.9347	20.1439	86.6796	110.3953	74.2019
19.5843	60.0313	70.9793	81.0739	79.3233	51.3648	76.5294	109.3239	56.9716	3.9567	85.8055	28.5301	41.9898	22.1642	3.607	40.2327	1.9321	14.7373	8.3379	14.7392	33.1587	12.4872	129.9393	44.7594	100.8137	37.8526	1	41.996	43.3849	129.4192	54.1884	5.2496	136.3519	46.6763	76.6219	19.5272	71.2987	15.6679	29.2762	34.2647	128.3912	8.636	34.497	47.0611	43.0439	127.0307	31.4995	91.9818	114.9136	87.6104
32.0879	78.4915	48.7634	101.388	97.6497	60.3589	70.256	139.7485	114.74	2.3506	43.9014	15.8125	40.4027	70.2469	11.191	38.0963	15.5046	23.4022	23.7938	40.2432	32.1948	5.1126	152.0692	80.1072	28.1878	51.8117	5.4775	25.4971	97.6667	152.9578	76.2172	28.0947	127.8425	58.0975	69.9955	45.4859	103.9436	12.1409	39.5369	10.8092	150.3078	6.8921	40.269	11.9215	63.2255	127.2228	80.3419	112.937	141.1634	89.955
20.0515	88.3266	50.0877	93.3117	102.8326	46.4812	45.6404	134.5944	88.9559	9.8739	86.5529	14.7906	48.7332	73.3066	7.3309	33.3127	8.7909	5.4494	36.8726	40.9805	30.9564	6.5161	153.6439	69.894	65.1788	48.7513	1.6571	31.8284	96.7954	146.6872	80.5952	39.9465	130.9639	67.697	76.807	56.785	112.9572	15.9328	48.8733	25.317	146.0782	12.4371	61.0076	9.7347	68.612	129.9787	42.6402	96.5427	128.0694	84.9834
39.4236	48.3787	74.3291	95.9626	108.6361	58.4	80.1033	133.0542	91.6226	1.9827	54.2998	30.7364	61.5858	19.5569	19.46	36.0114	27.3151	9.5489	1.6461	47.0644	33.4294	33.4614	155.4133	66.0485	58.316	22.1644	66.1123	6.0221	28.3385	151.7534	119.0776	26.1316	124.1389	11.6977	87.8523	55.2105	40.1943	29.4456	67.1586	17.4244	152.4315	31.7586	40.3841	15.2693	57.3541	137.1998	57.6684	104.6345	132.5337	80.0481
47.1026	68.1145	83.2954	87.4866	83.1444	50.4774	59.5695	137.0901	75.8921	14.0091	47.0386	10.7685	12.7433	33.4409	10.2095	35.9596	3.6287	32.1714	1.3151	62.8065	11.4237	7.2703	149.9564	84.3025	73.6786	39.9911	1.6102	9.9105	80.6683	151.236	40.4165	19.8322	145.0894	20.1244	101.1052	35.9797	100.6703	15.2051	34.5876	7.8734	144.3418	64.4175	33.3362	21.246	53.6628	136.472	75.3804	108.1034	133.9682	96.423
27.9833	57.2458	80.4213	85.8366	78.1376	31.5333	49.8132	133.9764	69.2046	20.8156	91.9079	10.5399	20.0821	73.4202	6.9695	32.0665	4.4363	18.1169	1	58.729	22.1449	19.129	146.0088	68.4693	76.2363	44.7151	2.5822	6.8464	67.2292	134.778	88.9109	40.875	132.5713	5.3073	90.9606	32.877	90.4893	65.6007	31.683	41.216	143.7194	24.6771	50.5833	5.0471	62.0068	126.1095	65.7905	94.0524	122.735	83.647
39.0407	59.2305	85.6369	112.0055	126.3064	47.266	82.4531	157.1852	100.1058	3.2122	93.0454	25.3964	80.0544	98.1721	21.9095	36.6527	32.3265	16.9474	17.4892	72.6046	61.0582	2.9442	158.2172	71.8856	83.4317	51.8359	33.2273	50.7228	75.5643	161.792	72.89	63.7969	143.9597	80.1967	76.1584	48.8858	120.9668	15.0565	72.0165	6.5717	149.5663	22.6746	34.9072	27.9297	65.6005	134.8342	92.9036	108.5513	144.1135	122.906
37.9951	60.7993	75.2829	93.591	71.1746	38.8963	83.1793	128.6699	99.695	4.6703	79.3615	35.9435	33.7051	83.8913	9.7539	37.0842	12.6218	25.8401	1.3054	72.4269	65.2613	2.6716	150.6473	69.3385	68.7554	59.0709	39.922	23.9623	39.4213	147.4528	72.0531	45.6869	127.2346	37.837	64.1229	36.8617	92.1932	23.1804	53.9215	14.4816	141.3218	30.1327	50.4599	5.2133	67.5785	124.3387	21.2515	101.0522	132.0171	107.1691
25.2048	71.0569	50.1063	97.4703	97.0371	53.0882	64.9744	120.8547	99.6701	1.3401	68.11	19.973	15.1993	1.6204	17.6141	37.3672	8.2459	36.2936	1	1.3057	18.0179	28.062	145.5794	82.0625	65.1895	48.9609	2.0022	2.3253	9.7788	142.5948	30.5608	56.4746	116.3155	8.7506	70.8097	41.9676	76.0433	22.4055	46.2311	35.1075	149.6648	1	70.8752	8.7307	97.2372	134.6208	39.9352	96.5805	128.6053	60.6684
33.9629	65.313	65.0828	71.1905	112.1285	50.7768	71.3737	121.3726	60.2372	4.2087	50.6421	25.396	13.7457	71.2626	8.3141	29.6146	8.3067	17.6652	1	57.3874	16.126	25.1412	151.5891	65.5955	59.8675	36.3116	44.2145	5.4137	14.5222	141.5386	91.1144	54.842	128.5051	21.7528	75.6959	38.7336	51.0294	52.7818	90.2447	24.8104	141.0411	46.357	64.5841	30.7828	86.2207	120.7801	60.6957	101.9306	128.1151	83.2749
17.9404	48.1854	77.1792	61.9812	112.7527	42.13	7.7163	115.4819	1	7.3929	24.0724	24.9622	1.6656	31.156	7.2437	27.7986	1	1.3284	4.193	16.821	55.2151	2.3377	120.7712	29.6082	51.5239	58.0397	8.2879	3.3811	6.9986	120.3	27.5645	6.4868	121.4906	22.0565	79.2912	19.0879	34.9404	60.3888	7.1652	45.7644	130.5382	17.8575	21.7852	2.3168	11.54	115.6793	37.5732	71.9095	82.7354	110.6591
43.9969	32.3745	82.8452	104.2054	14.1756	61.371	83.7479	143.7508	114.2256	5.3283	68.5697	13.9368	51.8056	38.1206	26.0975	34.9979	15.5963	15.2828	9.9474	68.4546	7.8828	32.642	153.5362	79.5572	42.8032	35.301	1	32.2972	77.9269	146.3541	14.856	43.4993	138.8567	1	63.2941	30.3349	75.9359	11.6923	33.974	31.7961	149.6375	49.2129	13.1901	16.216	62.7137	134.2409	77.3832	107.6686	136.7699	102.0578
35.5362	72.9321	74.1958	81.0601	67.0982	51.7326	66.8274	128.0272	97.0799	3.8134	58.0364	28.7309	30.2092	89.9713	7.6591	28.8614	1.3019	41.0143	7.476	71.7278	15.1814	102.6033	138.2921	65.5653	103.2588	21.5842	2.9536	76.1827	67.1447	145.9781	96.6479	79.5385	116.5594	54.52	58.4617	21.25	56.1819	17.1635	80.4547	20.7366	121.1808	25.9783	107.9303	3.9092	107.2162	118.6895	19.9739	66.8274	118.2768	106.1226
30.1895	104.3484	71.7278	88.2078	95.6365	6.4839	104.668	95.6687	53.8009	4.2558	55.516	7.3759	18.6168	21.7722	1	29.9722	22.8967	14.2058	2.7553	59.1921	32.2971	7.8843	144.7715	62.1263	75.4979	46.4435	42.8682	2.6702	13.5034	144.5293	44.3142	50.2765	134.384	37.8238	60.8655	68.5761	80.2779	10.7513	53.112	21.8187	138.6433	33.5402	52.2899	2.2498	68.1892	123.5285	55.2487	90.9102	121.3776	86.6177
29.5784	40.0608	73.5236	95.7238	59.231	58.9592	70.3884	133.1728	99.411	11.1335	85.0318	38.1255	45.7058	77.9925	3.4357	34.3584	37.2753	34.421	1	66.0359	29.6743	66.7356	129.5054	60.9748	10.8431	30.3377	7.2068	31.8488	2.5837	126.5884	81.5496	23.7801	100.8531	21.166	92.9336	22.7455	69.679	34.3776	41.5446	43.5914	139.6853	9.875	25.3393	45.4783	44.2823	116.545	63.3324	103.1763	127.6152	98.8511
25.9351	49.1219	71.432	95.7681	81.0391	54.9264	66.8603	128.8343	101.3006	10.3422	73.4117	30.7068	27.6864	4.9964	1.6363	36.2521	7.4445	12.2537	1.307	80.7615	42.1826	86.8772	102.9144	68.9647	67.5646	37.5052	36.0814	25.6435	78.0723	93.1372	109.6265	38.0371	67.2124	26.4031	61.7705	45.0359	39.7551	56.7331	64.2406	21.4416	117.08	5.664	45.378	16.958	68.4421	90.5812	77.4125	104.956	130.6317	32.1033
15.2116	65.2756	82.5345	74.0677	108.3333	47.0981	39.7533	113.4808	16.0502	12.3872	2.0788	11.4095	4.2104	70.0917	36.1472	37.9819	1.9667	1.9684	54.9385	82.0623	15.5898	64.9277	128.5104	74.1153	42.8925	40.6048	29.1345	15.3335	1.3131	112.7817	2.3221	18.4462	122.7054	5.0056	70.9938	85.087	29.8785	52.995	26.336	77.3729	121.4894	19.3606	21.8251	13.8984	7.4184	117.7414	60.4068	57.4917	109.5349	85.4895
28.5972	47.1865	78.4808	90.5816	101.2093	64.5467	72.6111	134.1301	108.8944	6.1616	80.5848	37.0297	37.1823	28.6282	35.0176	39.0381	34.6048	51.1811	45.7714	14.8773	18.2096	6.0146	151.0699	83.7449	37.3008	20.7411	29.4474	8.1199	45.4088	149.2099	92.9327	30.5313	135.9264	33.3476	86.0826	50.1211	69.0224	20.0978	71.9218	19.7998	148.1532	21.029	30.2447	6.8141	57.0271	124.6728	82.1667	109.8233	129.7076	89.313
28.9124	33.9692	74.0934	71.5878	117.2999	37.8082	78.2474	124.821	89.0029	6.7919	101.1665	34.2513	50.3238	96.4335	24.0017	31.4969	41.3127	11.8954	10.1102	50.6759	30.3455	46.7226	138.2519	31.8441	60.0731	61.2108	6.4446	62.5285	67.9598	134.4673	59.375	30.5436	130.2681	86.9665	71.6564	22.4357	78.5009	31.9762	34.1432	28.5213	132.8851	28.7741	16.747	79.0116	26.0965	131.2995	19.5362	72.5108	57.127	36.07
10.4154	46.2439	72.0613	53.3843	76.5018	35.2862	54.4486	108.2611	47.2435	1.3536	28.8802	21.2668	50.9773	86.1901	25.2383	24.1293	1	5.8996	3.1842	68.0909	31.6336	15.7224	105.1771	60.9794	3.2123	29.229	3.8239	38.2941	9.8111	105.7877	9.2464	17.0292	113.5623	96.362	54.4225	48.5906	4.3896	59.1246	53.3868	21.9283	87.1394	16.9721	38.4172	33.0349	31.4565	119.7148	22.4035	72.5452	109.2063	68.9746
23.0703	33.2162	76.818	36.4147	50.5959	34.289	2.0337	69.5427	33.7227	25.661	5.1589	43.7508	75.3936	107.2491	1.782	37.234	34.0219	15.0412	1	58.8481	3.9376	79.1004	115.4193	54.682	58.5953	58.3811	31.8373	32.5111	49.7688	133.4157	11.9693	16.5782	119.8397	48.2608	84.7285	62.1094	120.234	1	34.7393	4.7616	130.0831	109.9992	17.6524	30.7051	37.9949	105.1474	32.8329	67.4268	85.4817	124.6371
42.1831	37.4346	60.7715	69.2627	112.7641	27.9692	26.3787	102.8084	10.5351	6.1136	19.0675	13.8983	8.0197	19.3825	3.5562	31.2044	14.7701	1	1.3012	4.7036	8.5192	2.6066	127.3917	73.173	36.939	35.7638	20.1711	40.6351	3.1834	125.5755	12.4857	63.8468	121.8397	53.3134	86.9579	16.9084	2.9371	24.2943	39.3439	31.5294	124.4861	2.2918	44.6098	72.8209	54.5121	119.0404	25.9004	82.6638	111.0496	20.8799
31.7646	59.9591	30.5761	73.4349	44.7763	40.0202	8.3261	107.9417	16.1479	12.111	17.4297	43.6357	5.5778	17.2105	25.3959	24.0403	1.3001	14.1042	5.1325	12.0072	18.6644	2.6717	128.8909	54.6469	25.4868	20.8809	1.3031	7.1196	5.3468	121.7315	33.249	43.3617	104.6709	13.662	32.2096	20.5651	62.6595	61.239	33.1651	18.6299	127.1043	22.5288	54.324	59.1378	51.8733	107.9396	17.8557	77.1452	102.6896	78.5263
16.2397	67.254	71.6028	74.7512	11.6443	42.4545	1.661	117.562	39.8982	37.8468	55.2252	56.9102	14.2758	133.2467	10.8007	20.7527	15.9822	2.9577	1	100.0678	53.1432	35.961	135.3656	28.2993	86.9447	59.9903	1.6359	29.2917	20.8571	128.9422	40.0126	53.5424	100.3495	54.8644	51.8331	31.5182	56.7491	28.4991	23.4263	16.3342	131.4859	6.4018	66.4651	23.6734	68.0056	108.6961	8.4514	83.8019	118.5599	126.3789
39.1431	42.0564	93.2615	65.1933	102.3956	38.3987	1.35	119.0615	65.5236	9.8178	63.7198	21.8816	21.5709	2.6493	3.2388	31.2411	2.5568	7.563	3.2509	5.2761	38.3802	18.4994	150.201	56.363	95.7653	56.7277	17.5075	45.6489	8.8245	141.3262	84.6223	72.1914	125.9342	73.2995	52.6468	45.8535	29.252	35.2108	66.3501	29.4877	144.057	2.7235	90.167	11.7187	105.0175	134.5564	63.2115	56.0761	76.6355	22.4354
34.6614	90.4535	59.8122	93.0042	77.2198	24.9556	27.7862	145.6879	101.5245	28.2271	101.9501	33.5424	70.5285	85.3377	14.4264	39.1657	1.6104	29.5623	57.5927	44.4897	16.9249	16.6874	148.7446	73.7777	33.0772	17.0325	12.209	29.7926	54.2433	141.7676	51.7388	44.7408	132.5222	52.4495	64.0494	46.828	50.2273	10.2347	86.1874	9.1461	143.9661	36.3887	59.1661	5.7876	62.5394	123.398	89.6209	84.0027	126.1091	77.735
29.7736	12.0215	46.6022	87.9227	42.121	47.0986	51.5141	118.7229	85.2996	3.5369	74.6878	28.5929	18.8429	23.033	22.6097	35.9177	9.4404	23.2386	22.2124	76.4813	11.2915	71.8618	109.1029	61.8145	12.2298	52.9682	2.2782	22.6762	44.4823	114.7851	74.8511	20.9008	119.3814	11.2134	55.4639	39.7728	3.2636	39.8208	10.866	11.3035	83.1504	22.9062	10.9653	117.92	35.2299	118.156	43.6366	93.4645	111.982	86.254
39.101	71.7582	56.2235	62.9651	75.4646	51.9841	55.4734	133.9708	104.8978	3.7581	90.3146	25.1353	49.302	46.0284	16.0241	1	1	47.892	35.3671	59.2708	8.7888	24.5819	149.5541	48.1341	60.6384	17.7454	7.8576	24.6868	50.9953	140.3361	92.3798	47.2414	121.1627	20.7573	48.4623	48.043	83.8886	13.5581	54.5033	9.9913	146.0675	48.3878	44.6482	5.24	43.7521	122.6282	85.3847	49.3527	102.9336	100.3121
[truncated: 734 more columns]
